# Supplementary material
Source: publisher figshare collection journal article supplement (https://sage.figshare.com/ndownloader/files/14670785)
Supplement: Supplementary file 1 [file 14670785]

**Silymarin and silymarin nanoparticles guard against chronic unpredictable mild stress induced depressive-like behavior in mice: involvement of neurogenesis and NLRP3 inflammasome**

Aya Ashrafa, Passant A. Mahmouda, Haidy Redaa, Salma Mansoura, Mehad H. Helala, Haidy E. Michelb,*, Maha Nasrc,d

a Faculty of Pharmacy, Ain Shams University, Cairo, Egypt

b Department of Pharmacology and Toxicology, Faculty of Pharmacy, Ain Shams University, Cairo, Egypt

c Department of Pharmaceutics and Industrial Pharmacy, Faculty of Pharmacy, Ain Shams University, Cairo, Egypt

d Department of Pharmaceutics and Pharmaceutical technology, College of Pharmaceutical Sciences, Mutah University, Jordan

Corresponding author: Dr. Haidy E. Michel, Department of Pharmacology and Toxicology, Faculty of Pharmacy, Ain Shams University, Cairo, Egypt; E-mail: heidieffat@pharma.asu.edu.eg. Tel: +202 01224322126
